# Supplementary material
Source: MDPI journal article supplement (https://www.mdpi.com/2073-4344/13/12/1517)
Supplement: s1 [file s1]

# Micron-Sized Hierarchical Beta Zeolites Templated by Mesoscale Cationic Polymers as Robust Catalysts for Acylation of Anisole with Acetic Anhydride

Songsong Miao <sup>1,2</sup>, Shuaishuai Sun <sup>1</sup>, Zhenyu Lei <sup>1</sup>, Yuting Sun <sup>1</sup>, Chen Zhao <sup>1</sup>, Junling Zhan <sup>1</sup>, Wenxiang Zhang <sup>1</sup> and Mingjun Jia <sup>1,\*</sup>

<sup>1</sup> Key Laboratory of Surface and Interface Chemistry of Jilin Province, College of Chemistry, Jilin University, Changchun 130012, China

<sup>2</sup> Changchun Institute of Applied Chemistry, Chinese Academy of Sciences, Changchun 130022, China

\* Correspondence: jiamj@jlu.edu.cn; Tel.: +86-431-85168420

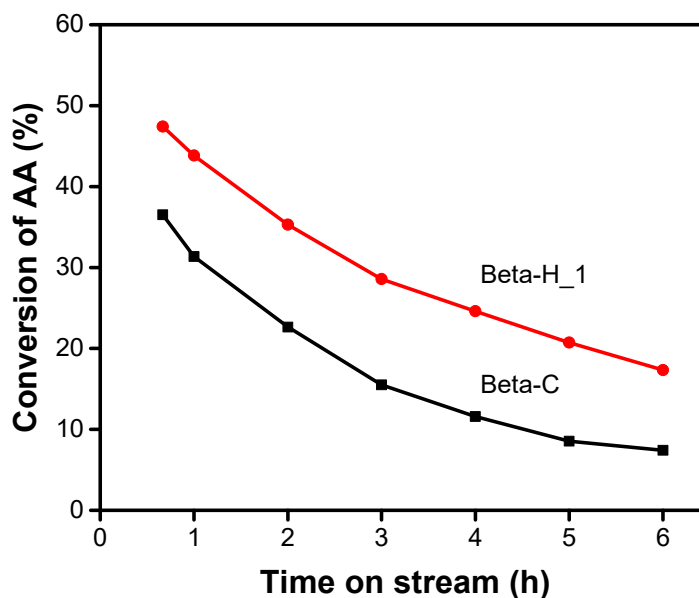

**Figure S1.** Conversion of AA over Beta-C and Beta-H<sub>1</sub> as a function of time on stream in acylation of anisole with acetic anhydride. Reaction condition: AA/AN = 1/1 (mol/mol), reactant mixture flow rate 0.08 mL/min, nitrogen flow rate 23 mL/min, temperature of 90 °C.

**Table S1.** Catalytic results of Friedel-Crafts acylation of AN with AA over different zeolites <sup>a</sup>.

| Molar ratio | Catalyst            | AA Conversion (%) |     |     |
|-------------|---------------------|-------------------|-----|-----|
|             |                     | 5 min             | 1 h | 5 h |
| AA/AN=1/6   | Beta-C              | 18                | 58  | 87  |
|             | Beta-H <sub>1</sub> | 21                | 66  | 93  |
|             | Beta-H <sub>2</sub> | 22                | 62  | 93  |
|             | Beta-H <sub>3</sub> | 20                | 60  | 90  |
| AA/AN=1/1   | Beta-C              | 4                 | 12  | 19  |
|             | Beta-H <sub>1</sub> | 7                 | 23  | 44  |
|             | Beta-H <sub>2</sub> | 7                 | 21  | 40  |
|             | Beta-H <sub>3</sub> | 6                 | 20  | 38  |

<sup>a</sup> Reaction conditions: catalyst 200 mg; reaction temperature 80 °C; 10 mmol AA, 60 mmol AN (AA/AN=1/6) or 35.5 mmol AA, 35.5 mmol AN (AA/AN=1/1).

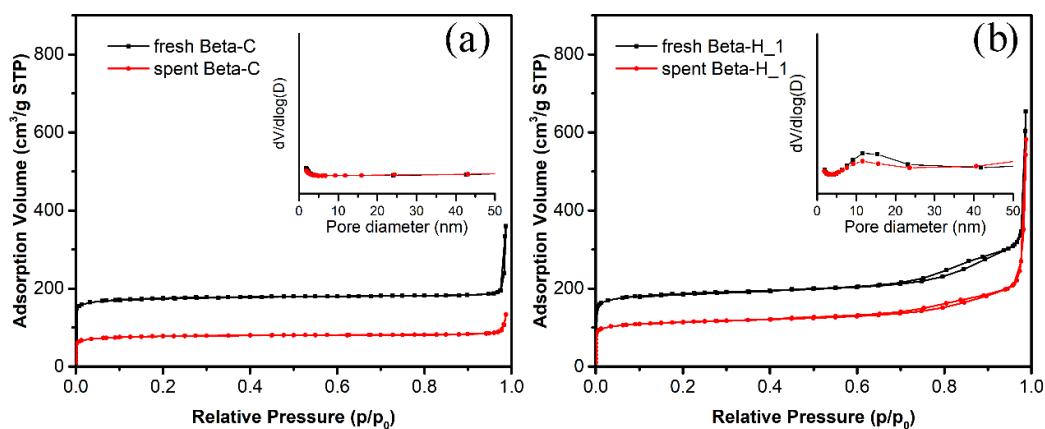

**Figure S2.** Comparison of nitrogen adsorption-desorption isotherms of fresh and spent (a) Beta-C and (b) Beta-H\_1 zeolites. The inset is the pore size distribution curves calculated from the adsorption branch (BJH).

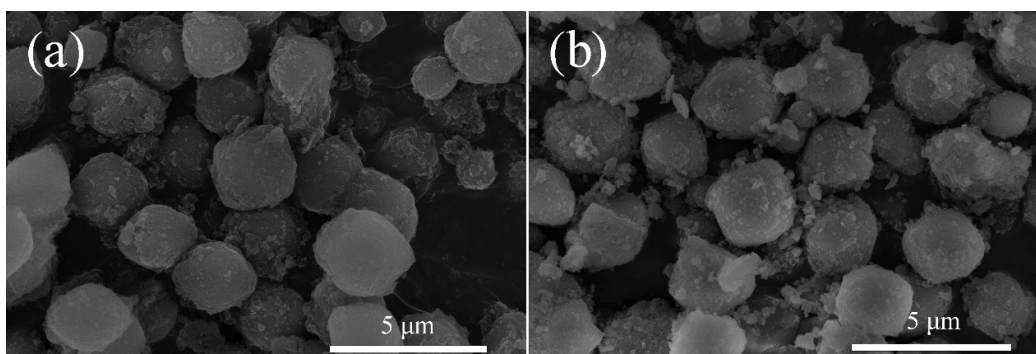

**Figure S3.** SEM image of (a) fresh Beta-H\_1 and (b) regenerated Beta-H\_1 after 4 catalytic runs.

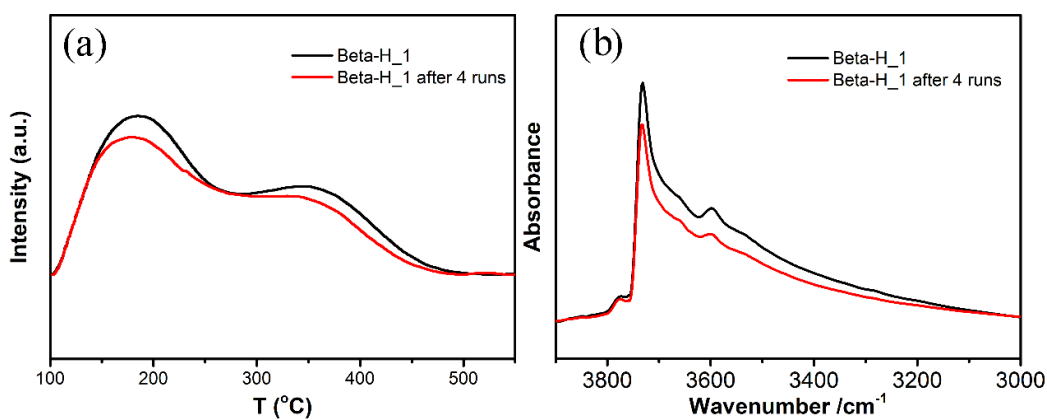

**Figure S4.** (a) NH<sub>3</sub>-TPD profiles and (b) FT-IR spectra of fresh Beta-H\_1 and regenerated Beta-H\_1 after 4 catalytic runs.
